# Supplementary material for: Development and validation of risk prediction equations to estimate future risk of heart failure in patients with diabetes: a prospective cohort study
Source: HighWire-hosted journal article supplement (doi:10.1136/bmjopen-2015-008503), 2015-09-01
Supplement: bmjopen-2015-008503Supp_tables.pdf [file bmjopen-2015-008503Supp_tables.pdf]

**Supplementary Table 1 Baseline characteristics of patients with diabetes aged 25-84 years and without heart failure at baseline in the QResearch derivation cohort by sex.**

|                                                   | women (%)     | men (%)       |
|---------------------------------------------------|---------------|---------------|
| type1                                             | 11526 (6.0)   | 13724 (5.6)   |
| type2                                             | 181370 (94.0) | 231186 (94.4) |
| Diet control                                      | 68724 (35.6)  | 87548 (35.7)  |
| Oral hypoglycaemics only                          | 99572 (51.6)  | 128663 (52.5) |
| Oral hypoglycaemics + insulin                     | 182 (0.1)     | 217 (0.1)     |
| Insulin only                                      | 12892 (6.7)   | 14758 (6.0)   |
| <b>Years since diagnosis of diabetes</b>          |               |               |
| < 1year                                           | 104788 (54.3) | 132553 (54.1) |
| 1-3 years                                         | 32204 (16.7)  | 42434 (17.3)  |
| 4-6 years                                         | 18146 (9.4)   | 22896 (9.3)   |
| 7-10 years                                        | 15199 (7.9)   | 19038 (7.8)   |
| ≥11 years                                         | 22559 (11.7)  | 27989 (11.4)  |
| mean age (SD)                                     | 61.1 (14.1)   | 59.1 (13.4)   |
| mean Townsend deprivation score (SD) <sup>§</sup> | .8 (3.4)      | .5 (3.4)      |
| <b>Ethnicity</b>                                  |               |               |
| Ethnicity recorded                                | 146490 (75.9) | 184868 (75.5) |
| White/not recorded <sup>‡</sup>                   | 158237 (82.0) | 205465 (83.9) |
| Indian                                            | 6701 (3.5)    | 8833 (3.6)    |
| Pakistani                                         | 4899 (2.5)    | 5614 (2.3)    |
| Bangladeshi                                       | 5894 (3.1)    | 6550 (2.7)    |
| Other Asian                                       | 3098 (1.6)    | 3974 (1.6)    |
| Caribbean                                         | 5470 (2.8)    | 4505 (1.8)    |
| Black african                                     | 3786 (2.0)    | 4571 (1.9)    |
| Chinese                                           | 684 (0.4)     | 712 (0.3)     |
| Other                                             | 4127 (2.1)    | 4686 (1.9)    |
| <b>smoking status</b>                             |               |               |
| Smoking status recorded                           | 183473 (95.1) | 233813 (95.5) |
| Non smoker                                        | 115026 (59.6) | 104614 (42.7) |
| Ex-smoker                                         | 39246 (20.3)  | 79314 (32.4)  |
| Light smoker (1-9/day)                            | 15647 (8.1)   | 29196 (11.9)  |
| Moderate smoker (10-19/day)                       | 7540 (3.9)    | 10403 (4.2)   |
| Heavy smoker (20+/day)                            | 6014 (3.1)    | 10286 (4.2)   |
| <b>Family history and co-morbidity</b>            |               |               |
| Family history premature CHD                      | 29610 (15.4)  | 32304 (13.2)  |
| Rheumatoid arthritis                              | 7044 (3.7)    | 4259 (1.7)    |
| Atrial fibrillation                               | 5958 (3.1)    | 7995 (3.3)    |
| Cardiovascular disease                            | 27861 (14.4)  | 48516 (19.8)  |
| Treated hypertension                              | 74881 (38.8)  | 80988 (33.1)  |
| Chronic renal disease                             | 1963 (1.0)    | 2339 (1.0)    |
| <b>clinical values</b>                            |               |               |
| HBA1C recorded                                    | 136621 (70.8) | 173735 (70.9) |

|                                        |               |               |
|----------------------------------------|---------------|---------------|
| Mean HBA1C mmol/mol (SD)               | 61.4 (20.8)   | 63.1 (22.0)   |
| BMI recorded                           | 174049 (90.2) | 223360 (91.2) |
| mean BMI kg/m2 (SD)                    | 31.1 (6.3)    | 29.8 (5.3)    |
| Cholesterol /HDL ratio recorded        | 102327 (53.0) | 133213 (54.4) |
| Mean cholesterol /HDL ratio (SD)       | 4.1 (1.4)     | 4.5 (1.5)     |
| Systolic blood pressure recorded       | 187397 (97.1) | 237226 (96.9) |
| Mean systolic blood pressure mmHg (SD) | 139.3 (19.9)  | 138.6 (18.5)  |

<sup>§</sup> increasing levels of Townsend scores indicating increasing levels of material deprivation.

± includes patients who were either recorded as a white ethnicity or those without any ethnicity recorded

**Supplementary Table 2 Distribution of patients in the QResearch derivation cohort and the QResearch and CPRD validation cohorts within 10 geographical regions in England**

|                      | <b>QResearch<br/>derivation cohort<br/>(%)</b> | <b>QResearch<br/>validation cohort<br/>(%)</b> | <b>CPRD validation<br/>cohort<br/>(%)</b> |
|----------------------|------------------------------------------------|------------------------------------------------|-------------------------------------------|
| East Midlands        | 24973 (5.70)                                   | 10499 (7.66)                                   | 7550 (3.81)                               |
| East of England      | 31500 (7.19)                                   | 9435 (6.89)                                    | 23052 (11.65)                             |
| London               | 100365 (22.92)                                 | 25996 (18.97)                                  | 29369 (14.84)                             |
| North East           | 21848 (4.99)                                   | 6544 (4.78)                                    | 4147 (2.10)                               |
| North West           | 64286 (14.68)                                  | 21499 (15.69)                                  | 33454 (16.90)                             |
| South Central        | 47991 (10.96)                                  | 15201 (11.09)                                  | 22154 (11.19)                             |
| South East           | 29267 (6.68)                                   | 12466 (9.10)                                   | 21372 (10.80)                             |
| South West           | 43598 (9.96)                                   | 12710 (9.28)                                   | 25281 (12.77)                             |
| West Midlands        | 49921 (11.40)                                  | 16849 (12.30)                                  | 22174 (11.20)                             |
| Yorkshire and Humber | 24057 (5.49)                                   | 5829 (4.25)                                    | 9352 (4.73)                               |

**Supplementary table 3 unadjusted hazard ratios with 95% confidence intervals for heart failure in men and women in the derivation cohort.**

|                                           | <i>Unadjusted Adjusted hazard ratio (95% CI)</i> |                        |
|-------------------------------------------|--------------------------------------------------|------------------------|
|                                           | <b>women<sup>1</sup></b>                         | <b>men<sup>2</sup></b> |
| age <sup>3</sup>                          | 1.08 (1.07 to 1.08 )                             | 1.07 (1.07 to 1.07 )   |
| Cholesterol/HDL ratio <sup>3</sup>        | 0.99 (0.98 to 1.01 )                             | 0.95 (0.94 to 0.96 )   |
| Townsend deprivation score <sup>3,4</sup> | 1.17 (1.13 to 1.20 )                             | 1.11 (1.08 to 1.13 )   |
| <b>duration of diabetes at baseline</b>   |                                                  |                        |
| <1 year                                   | 1.06 (1.01 to 1.12 )                             | 0.94 (0.90 to 0.98 )   |
| 1-3 years                                 | 1.23 (1.17 to 1.31 )                             | 1.25 (1.19 to 1.31 )   |
| 4-6 years                                 | 1.48 (1.40 to 1.57 )                             | 1.35 (1.28 to 1.42 )   |
| 7-10 years                                | 1.51 (1.44 to 1.59 )                             | 1.50 (1.44 to 1.57 )   |
| ≥11 years                                 | 1.06 (1.01 to 1.12 )                             | 0.94 (0.90 to 0.98 )   |
| <b>smoking status</b>                     |                                                  |                        |
| non-smoker                                |                                                  |                        |
| Ex-smoker                                 | 1.23 (1.18 to 1.29 )                             | 1.24 (1.20 to 1.29 )   |
| light smoker (1-9/day)                    | 0.95 (0.89 to 1.02 )                             | 1.02 (0.97 to 1.07 )   |
| moderate smoker (10-19/day)               | 0.98 (0.89 to 1.08 )                             | 0.87 (0.80 to 0.95 )   |
| heavy smoker (20+/day)                    | 1.02 (0.92 to 1.13 )                             | 0.89 (0.81 to 0.96 )   |
| <b>ethnicity</b>                          |                                                  |                        |
| white/not recorded                        |                                                  |                        |
| Indian                                    | 0.61 (0.53 to 0.69 )                             | 0.64 (0.58 to 0.71 )   |
| Pakistani                                 | 0.62 (0.53 to 0.73 )                             | 0.66 (0.58 to 0.77 )   |
| Bangladeshi                               | 0.45 (0.37 to 0.53 )                             | 0.87 (0.77 to 0.98 )   |
| Other Asian                               | 0.51 (0.41 to 0.65 )                             | 0.47 (0.38 to 0.57 )   |
| Black Caribbean                           | 0.74 (0.66 to 0.85 )                             | 0.90 (0.79 to 1.01 )   |
| Black African                             | 0.49 (0.39 to 0.62 )                             | 0.35 (0.28 to 0.45 )   |
| Chinese                                   | 0.43 (0.26 to 0.71 )                             | 0.33 (0.19 to 0.56 )   |
| Other ethnic group                        | 0.60 (0.50 to 0.72 )                             | 0.58 (0.49 to 0.69 )   |
| <b>co-morbidity</b>                       |                                                  |                        |
| type 1 diabetes <sup>5</sup>              | 0.33 (0.30 to 0.38 )                             | 0.35 (0.31 to 0.39 )   |
| atrial fibrillation <sup>6</sup>          | 4.67 (4.38 to 4.98 )                             | 3.92 (3.70 to 4.15 )   |
| cardiovascular disease <sup>6</sup>       | 3.28 (3.15 to 3.42 )                             | 3.41 (3.30 to 3.53 )   |
| chronic renal disease <sup>6</sup>        | 2.25 (1.93 to 2.61 )                             | 2.57 (2.27 to 2.90 )   |

**Notes**

<sup>1</sup> heart failure model in women included body mass index (2 FP terms -1 -.5), systolic blood pressure (2 FP terms -.5 0), hba1c (2 FP terms -2 -2)

<sup>2</sup> heart failure model in men included body mass index (2 FP terms -2 0), systolic blood pressure (2 FP terms 0 .5), hba1c (2 FP terms -2 -2)

<sup>3</sup> adjusted hazard ratio is per unit increase

<sup>4</sup> the Townsend deprivation score ranges between -7 (most affluent) and +11 (most deprived).

<sup>5</sup> adjusted hazard ratio compared with type 2 diabetes

<sup>6</sup> adjusted hazard ratio compared with patients without the condition at baseline

**Supplementary table 4 Codes used to identify patients with chronic renal disease**

| <i>ReadTerm</i> | <i>ReadDesc</i>                                                |
|-----------------|----------------------------------------------------------------|
| 1Z13            | Chronic kidney disease stage 4                                 |
| 1Z14            | Chronic kidney disease stage 5                                 |
| 1Z1H            | Chronic kidney disease stage 4 with proteinuria                |
| 1Z1H-1          | CKD stage 4 with proteinuria                                   |
| 1Z1J            | Chronic kidney disease stage 4 without proteinuria             |
| 1Z1J-1          | CKD stage 4 without proteinuria                                |
| 1Z1K            | Chronic kidney disease stage 5 with proteinuria                |
| 1Z1K-1          | CKD stage 5 with proteinuria                                   |
| 1Z1L            | Chronic kidney disease stage 5 without proteinuria             |
| 1Z1L-1          | CKD stage 5 without proteinuria                                |
| 7B063           | Exploration of renal transplant                                |
| 8L50            | Renal transplant planned                                       |
| K01             | Nephrotic syndrome                                             |
| K010            | Nephrotic syndrome with proliferative glomerulonephritis       |
| K011            | Nephrotic syndrome with membranous glomerulonephritis          |
| K012            | Nephrotic syndrome+membranoproliferative glomerulonephritis    |
| K013            | Nephrotic syndrome with minimal change glomerulonephritis      |
| K013-1          | Lipoid nephrosis                                               |
| K013-2          | Steroid sensitive nephrotic syndrome                           |
| K014            | Nephrotic syndrome, minor glomerular abnormality               |
| K015            | Nephrotic syndrome, focal and segmental glomerular lesions     |
| K016            | Nephrotic syndrome, diffuse membranous glomerulonephritis      |
| K017            | Nephrotic syn difus mesangial prolifertiv glomerulonephritis   |
| K018            | Nephrotic syn,difus endocapillary prolifitv glomerulonephritis |
| K019            | Nephrotic syn,difuse mesangiocapillary glomerulonephritis      |
| K01A            | Nephrotic syndrome, dense deposit disease                      |
| K01B            | Nephrotic syndrome, diffuse crescentic glomerulonephritis      |
| K01w            | Congenital nephrotic syndrome                                  |
| K01w0           | Finnish nephrosis syndrome                                     |
| K01w0-1         | Microcystic type congenital nephrotic syndrome                 |
| K01wz           | Congenital nephrotic syndrome NOS                              |
| K01x            | Nephrotic syndrome in diseases EC                              |
| K01x0           | Nephrotic syndrome in amyloidosis                              |
| K01x1           | Nephrotic syndrome in diabetes mellitus                        |
| K01x1-1         | Kimmelstiel - Wilson disease                                   |
| K01x2           | Nephrotic syndrome in malaria                                  |
| K01x3           | Nephrotic syndrome in polyarteritis nodosa                     |
| K01x4           | Nephrotic syndrome in systemic lupus erythematosus             |
| K01x4-1         | Lupus nephritis                                                |
| K01xz           | Nephrotic syndrome in diseases EC NOS                          |
| K01y            | Nephrotic syndrome with other pathological kidney lesions      |

|         |                                                         |
|---------|---------------------------------------------------------|
| K01z    | Nephrotic syndrome NOS                                  |
| K02     | Chronic glomerulonephritis                              |
| K02-1   | Nephritis - chronic                                     |
| K02-2   | Nephropathy - chronic                                   |
| K020    | Chronic proliferative glomerulonephritis                |
| K021    | Chronic membranous glomerulonephritis                   |
| K022    | Chronic membranoproliferative glomerulonephritis        |
| K023    | Chronic rapidly progressive glomerulonephritis          |
| K02y    | Other chronic glomerulonephritis                        |
| K02y0   | Chronic glomerulonephritis + diseases EC                |
| K02y1   | Chronic exudative glomerulonephritis                    |
| K02y2   | Chronic focal glomerulonephritis                        |
| K02y3   | Chronic diffuse glomerulonephritis                      |
| K02yz   | Other chronic glomerulonephritis NOS                    |
| K02z    | Chronic glomerulonephritis NOS                          |
| K05     | Chronic renal failure                                   |
| K05-1   | Chronic uraemia                                         |
| K05-2   | End stage renal failure                                 |
| K050    | End stage renal failure                                 |
| K100    | Chronic pyelonephritis                                  |
| K1000   | Chronic pyelonephritis without medullary necrosis       |
| K1001   | Chronic pyelonephritis with medullary necrosis          |
| K1002   | Chronic pyelitis                                        |
| K1003   | Chronic pyonephrosis                                    |
| K1004   | Nonobstructive reflux-associated chronic pyelonephritis |
| K1005   | Chronic obstructive pyelonephritis                      |
| K1006   | Calculous pyelonephritis                                |
| K100z   | Chronic pyelonephritis NOS                              |
| SP083   | Kidney transplant failure and rejection                 |
| TB001   | Kidney transplant with complication, without blame      |
| TB001-1 | Renal transplant with complication, without blame       |
| ZV420   | [V]Kidney transplanted                                  |
